# Supplementary material for: Point-of-Care Serum Proenkephalin as an Early Predictor of Mortality in Patients Presenting to the Emergency Department with Septic Shock
Source: MDPI journal article supplement (doi:10.3390/biomedicines12051004), 2024-05-02
Supplement: s1 [file s1]

## SUPPLEMENTARY MATERIAL

**Table S1.** Sepsis and septic shock clinical criteria according to the Third International Consensus Definitions for Sepsis and Septic Shock, modified from [1] :

|                               | <i>Sepsis</i>                     | <i>Septic shock</i>                  |
|-------------------------------|-----------------------------------|--------------------------------------|
| <b>2015 Clinical criteria</b> | Suspected or documented infection | Sepsis and                           |
|                               | and                               | vasopressor therapy needed to        |
|                               | an acute increase of $\geq 2$     | elevate MAP $\geq 65$ mm Hg          |
|                               | SOFA points (a proxy              | and                                  |
|                               | for organ dysfunction)            | lactate $> 2$ mmol/L (18 mg/dL)      |
|                               |                                   | despite adequate fluid resuscitation |

Abbreviations: MAP=Mean Arterial Pressure; SOFA Sequential Organ Failure Assessment

**Table S2.** Proposed staging for acute kidney injury according to KDIGO criteria, modified from [26]:

| STAGE | <i>Serum Creatinine</i>                                                                                 | <i>Urine output</i>                                         |
|-------|---------------------------------------------------------------------------------------------------------|-------------------------------------------------------------|
| 1     | 1.5–1.9 times baseline<br>or<br>$\geq 0.3$ mg/dl ( $\geq 26.5$ mol/l) increase                          | $< 0.5$ ml/kg/h for 6–12 h                                  |
| 2     | 2.0–2.9 times baseline                                                                                  | $< 0.5$ ml/kg/h for $\geq 12$ h                             |
| 3     | 3 times baseline or $\geq 4.0$ mg/dl ( $\geq 353.6$ mol/l) increase or initiation of RRT or in patients | $< 0.3$ ml/kg/h for $\geq 24$ h<br>or<br>anuria $\geq 12$ h |

Abbreviations: RRT=Renal Replacement Therapy
